# Supplementary material for: Dimer Asymmetry and Light Activation Mechanism in Brucella Blue-Light Sensor Histidine Kinase
Source: PubMed Central journal article supplement (PMC8092228; doi:10.1128/mbio.00264-21), 2021-04-20
Supplement: mBio.00264-21-sf001.pdf [file mBio.00264-21-sf001.pdf]

**A**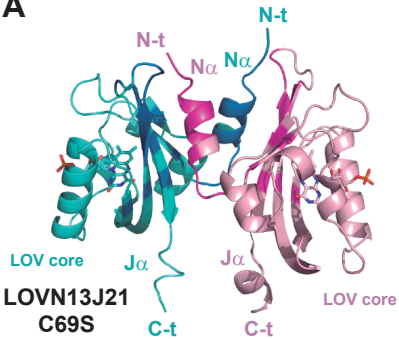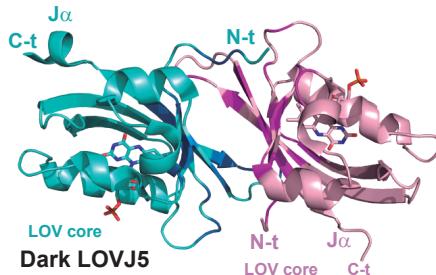**C**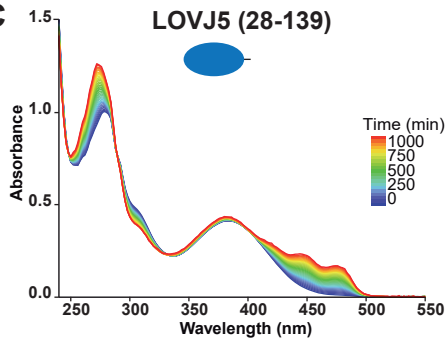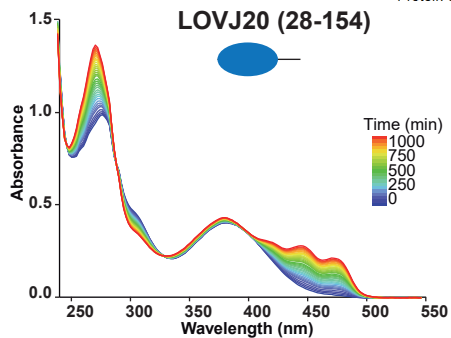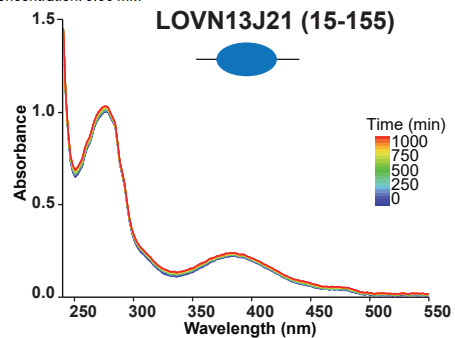**B**

Oligomeric state of LOV-containing constructs

| Constructs              | Monomer MW (kDa) | Dimer MW (kDa) | SLS MW (kDa) |
|-------------------------|------------------|----------------|--------------|
| LOVJ5 (28-139)          | 14.4             | 28.8           | 21 ± 2       |
| LOVJ20 (28-154)         | 15.4             | 30.8           | 20 ± 1       |
| LOVN13J21 C69S (15-155) | 16.7             | 33.4           | 34 ± 2       |

Protein concentration: 0.06 mM; Volume injected: 500  $\mu$ l

| Constructs              | Monomer $D_H$ (nm) | Dimer $D_H$ (nm) | DLS $D_H$ (nm) |
|-------------------------|--------------------|------------------|----------------|
| LOVJ5 (28-139)          | 3.88               | 4.74             | 3.49 ± 0.24    |
| LOVJ20 (28-154)         | 3.94               | 4.82             | 4.12 ± 0.30    |
| LOVN13J21 C69S (15-155) | 4.05               | 4.95             | 5.35 ± 0.39    |

Protein concentration: 0.06 mM
