# Supplementary material for: Dimer Asymmetry and Light Activation Mechanism in Brucella Blue-Light Sensor Histidine Kinase
Source: PubMed Central journal article supplement (PMC8092228; doi:10.1128/mbio.00264-21), 2021-04-20

**A** LOVN13J21 (15-155)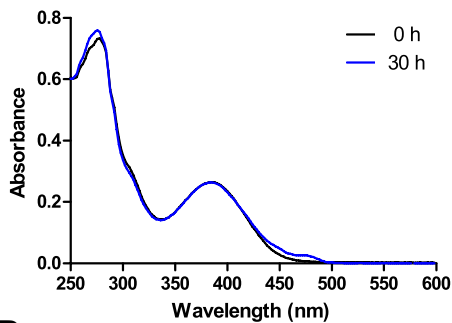**A** LOV-PAS (15-273)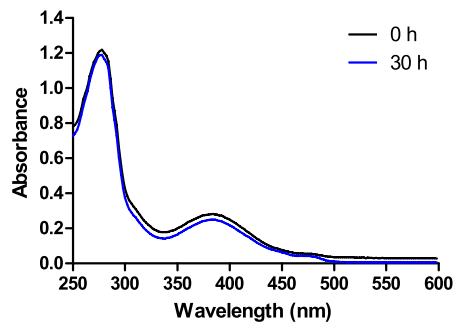**A** LOV-PAS-HK (15-489)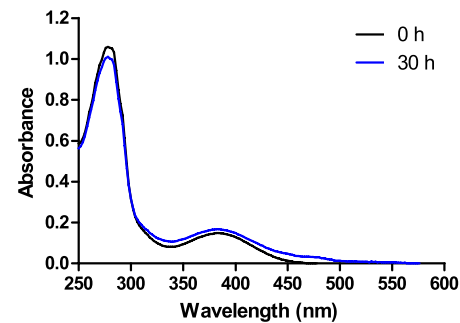**B**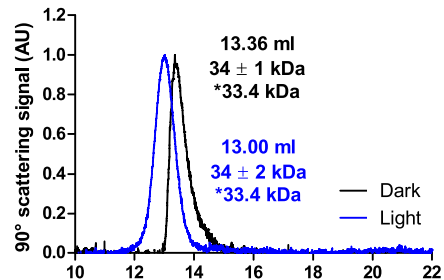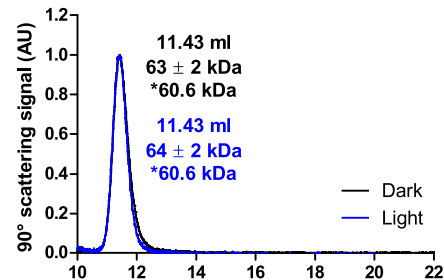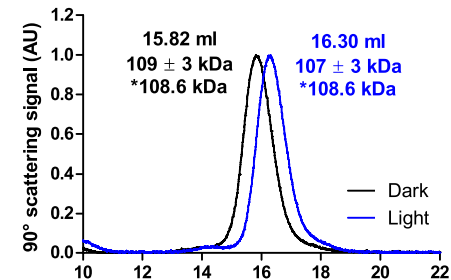**C**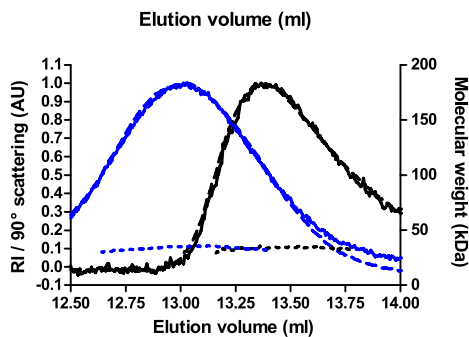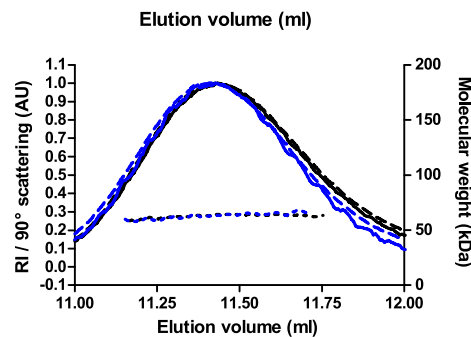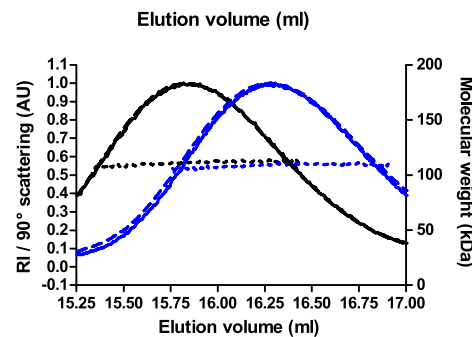

Supplement: mBio.00264-21-sf002.pdf [file mBio.00264-21-sf002.pdf]
