# Supplementary material for: Dimer Asymmetry and Light Activation Mechanism in Brucella Blue-Light Sensor Histidine Kinase
Source: PubMed Central journal article supplement (PMC8092228; doi:10.1128/mbio.00264-21), 2021-04-20

**A**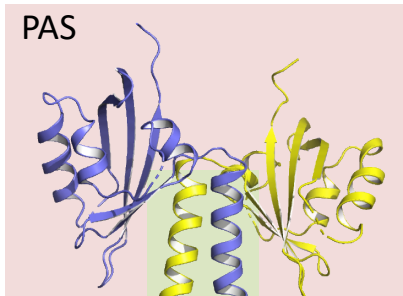**LOV**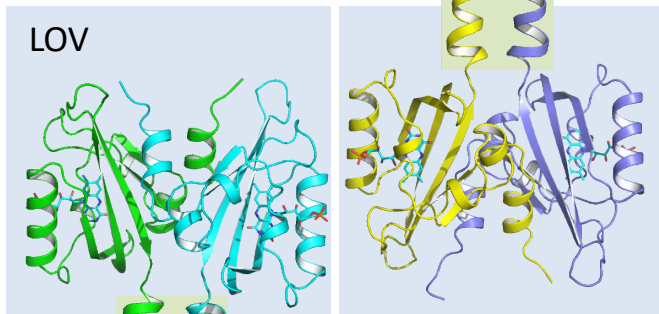**PAS**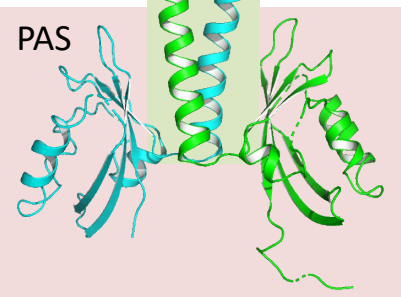**B**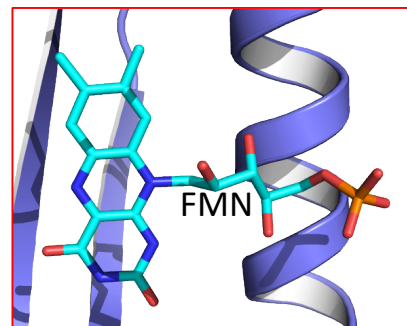**C**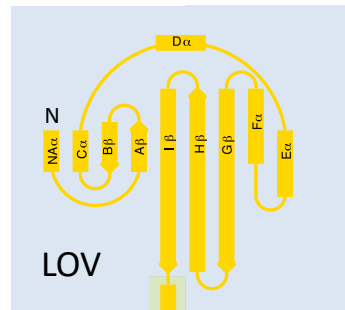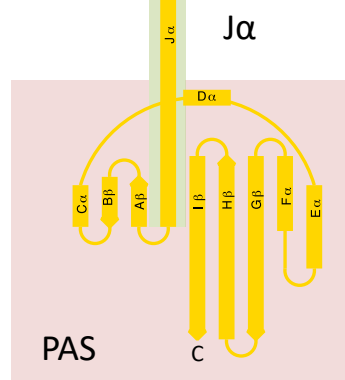

Supplement: mBio.00264-21-sf003.pdf [file mBio.00264-21-sf003.pdf]
